# Supplementary material for: Cep44 functions in centrosome cohesion by stabilizing rootletin
Source: PubMed Central journal article supplement (PMC7044459; doi:10.1242/jcs.239616), 2020-02-21
Supplement: joces-133-239616-s1.pdf [file joces-133-239616-s1.pdf]

## Supplementary information

### Fig. S1: Validation of the Cep44 antibody

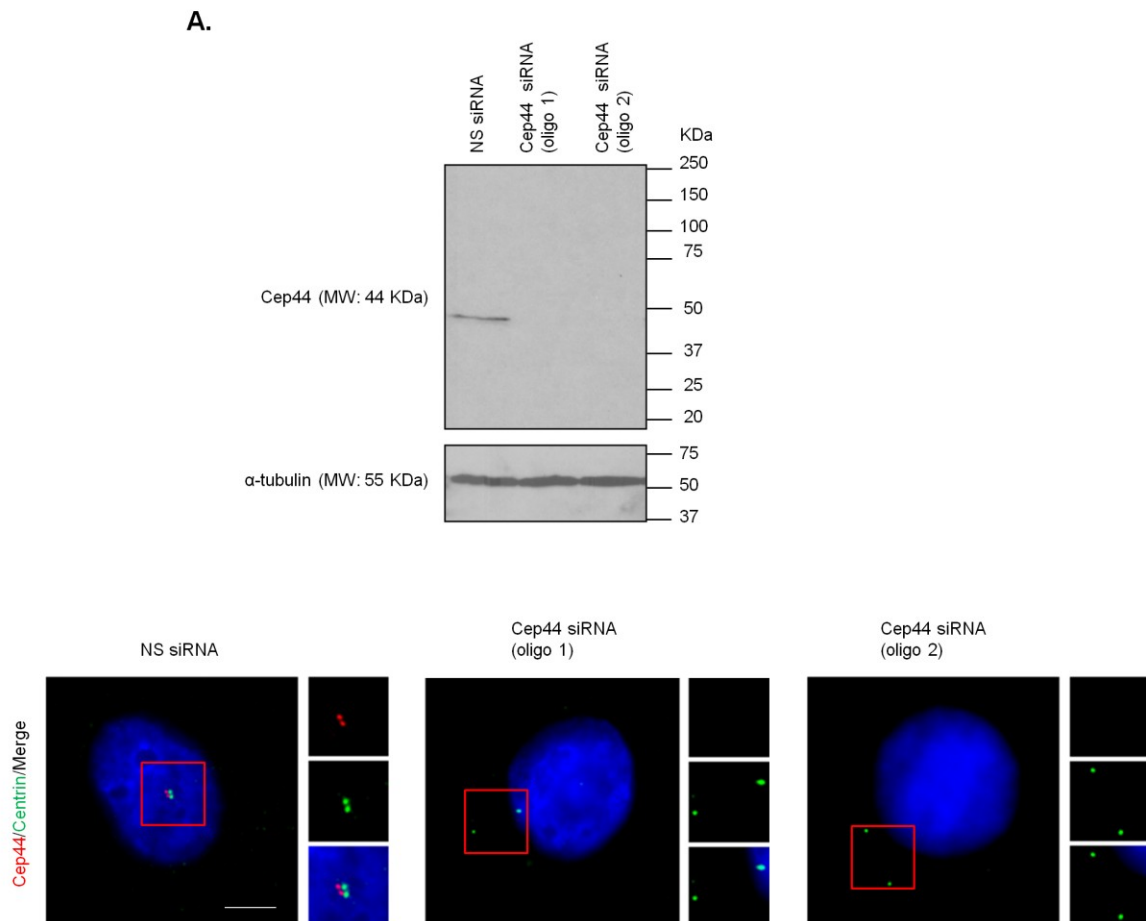

(A) U2OS cells were transfected with NS (non-specific) or Cep44 siRNAs (oligo 1 or 2). Lysates were Western blotted with antibody against Cep44.  $\alpha$ -tubulin was used as loading control. (B) U2OS cells transfected with NS or Cep44 siRNAs were stained with DAPI and the indicated antibodies. Scale bar, 10  $\mu$ m.
